# Supplementary material
Source: PubMed Central journal article supplement (PMC9235543)
Supplement: NIHMS1816731-supplement-suppl_material.pdf [file NIHMS1816731-supplement-suppl_material.pdf]

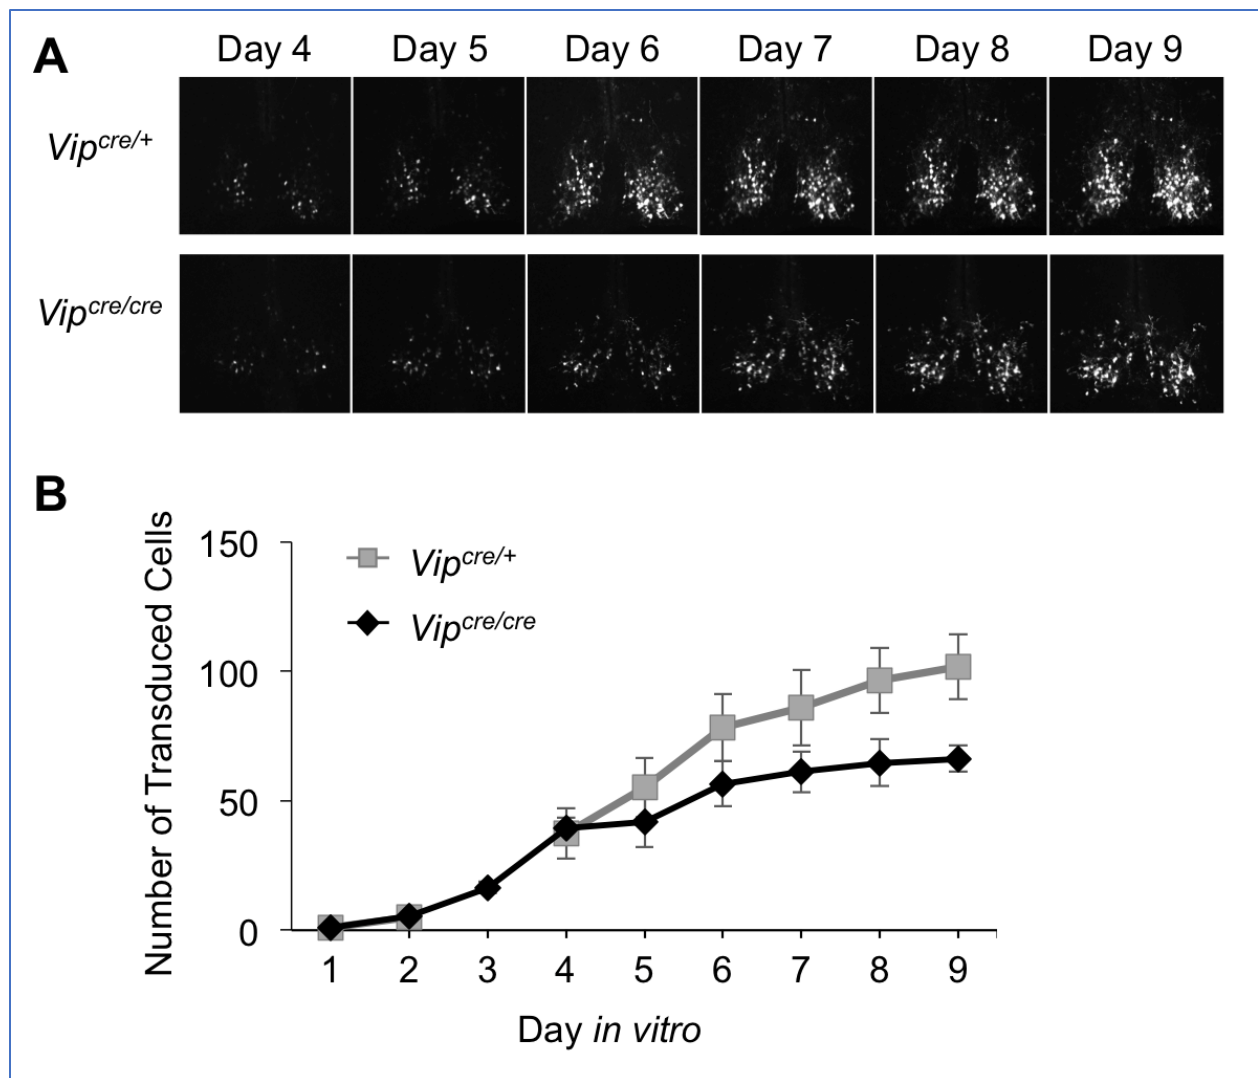

**Figure S1.** Cre-dependent transduction is retained in the *Vip<sup>cre/cre</sup>* SCN. A) Representative images illustrating Cre-dependent tdTomato transduction *in vitro* in a *Vip<sup>cre/+</sup>* and *Vip<sup>cre/cre</sup>* SCN. B) Viral-mediated transduction does not differ statistically between *Vip<sup>cre/+</sup>* and *Vip<sup>cre/cre</sup>* SCN (n = 4-5 SCN slices/condition).

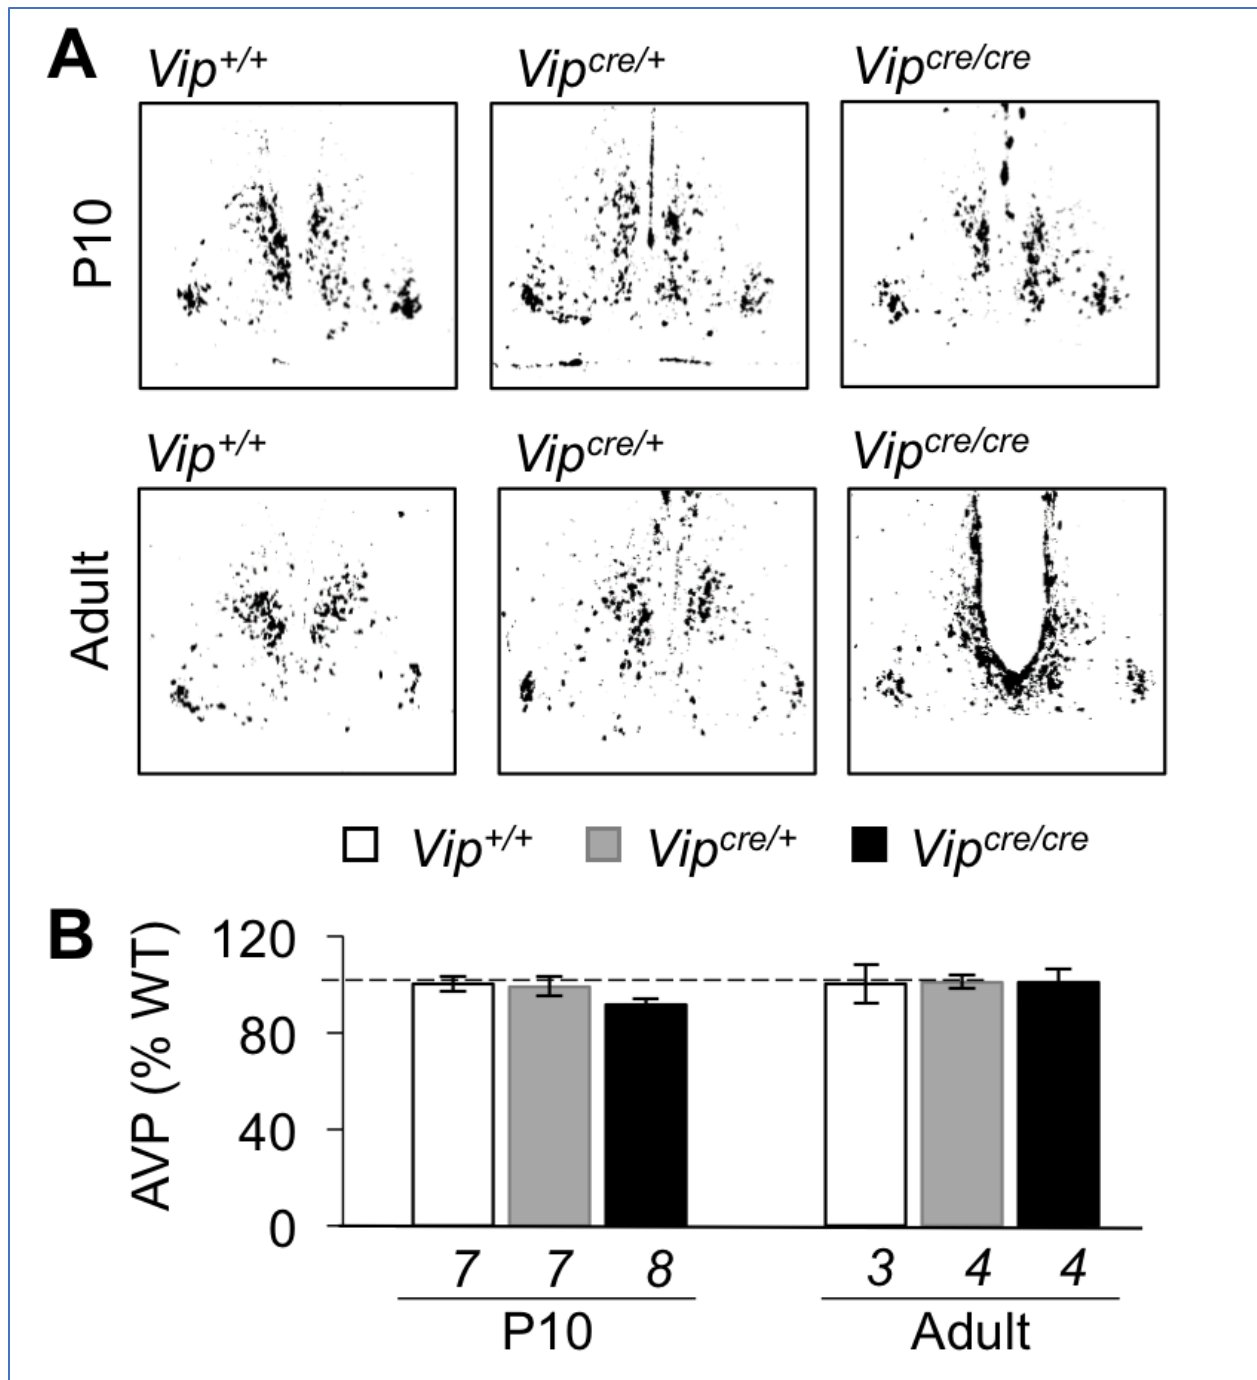

**Figure S2.** The VIP-IRES-Cre transgene does not alter AVP expression. A) Representative thresholded images of AVP expression in the SCN of *Vip*<sup>+/+</sup>, *Vip*<sup>cre/+</sup>, and *Vip*<sup>cre/cre</sup> mice collected at P10 or in adulthood. B) Average AVP-immunoreactivity in the SCN does not differ by genotype. Italicized numbers below abscissa in B) indicate sample size.

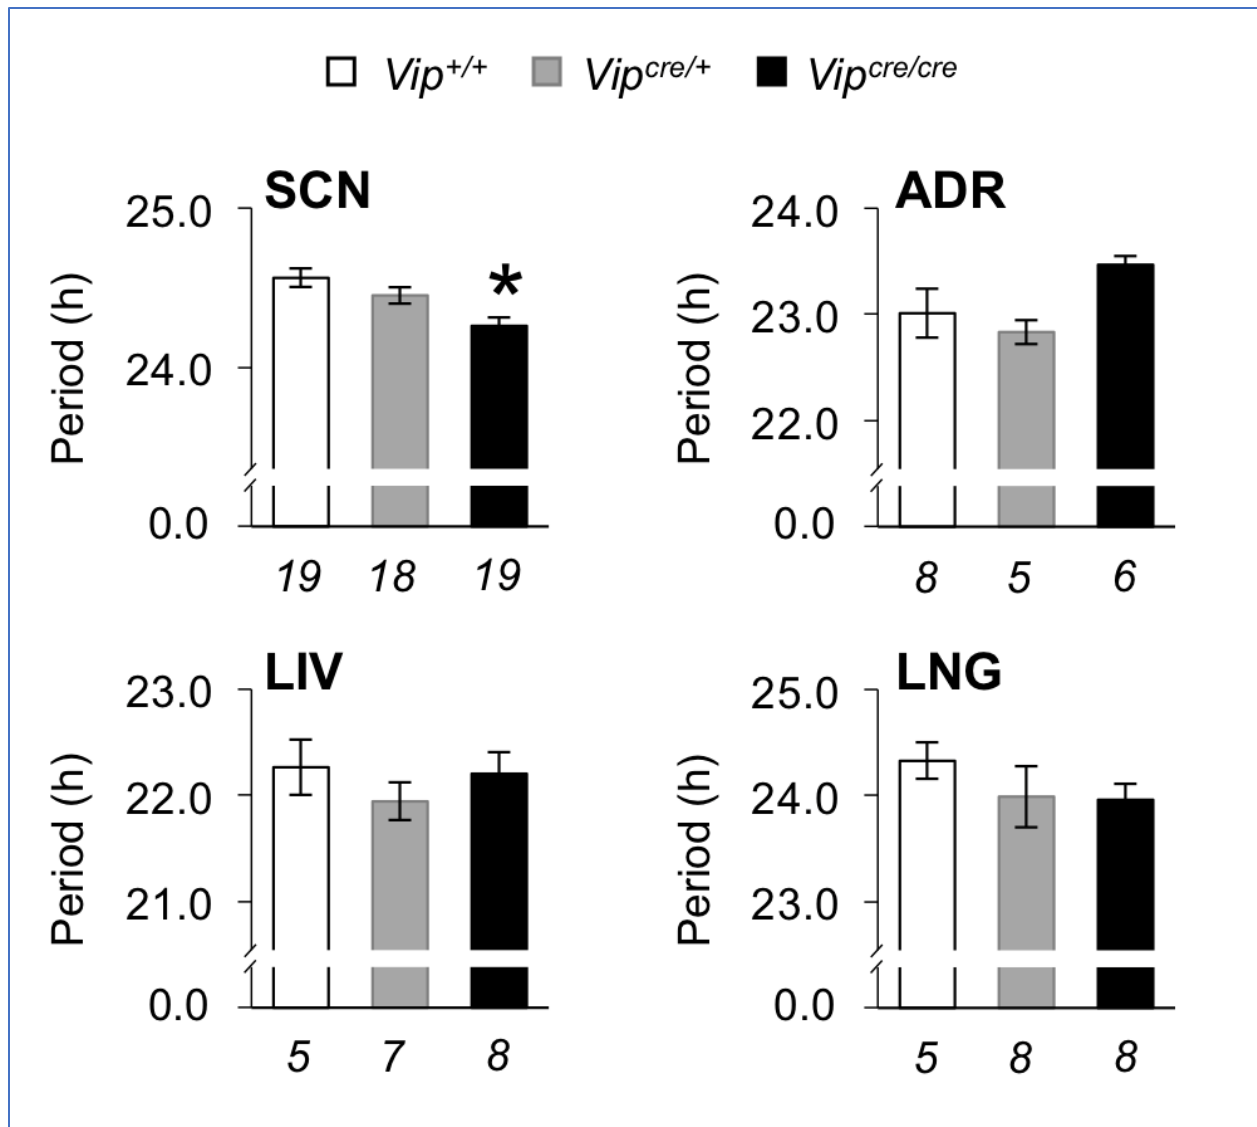

**Figure S3.** PER2::LUC rhythms have shorter period in  $Vip^{cre/cre}$  SCN, but not in peripheral tissues. Italicized numbers below abscissa indicate sample size. \* Differs from  $Vip^{+/+}$ , Tukey's HSD,  $p < 0.05$ . Note that the ordinate is plotted differently for each tissue. ADR: adrenal, LIV: liver, LNG: lung.

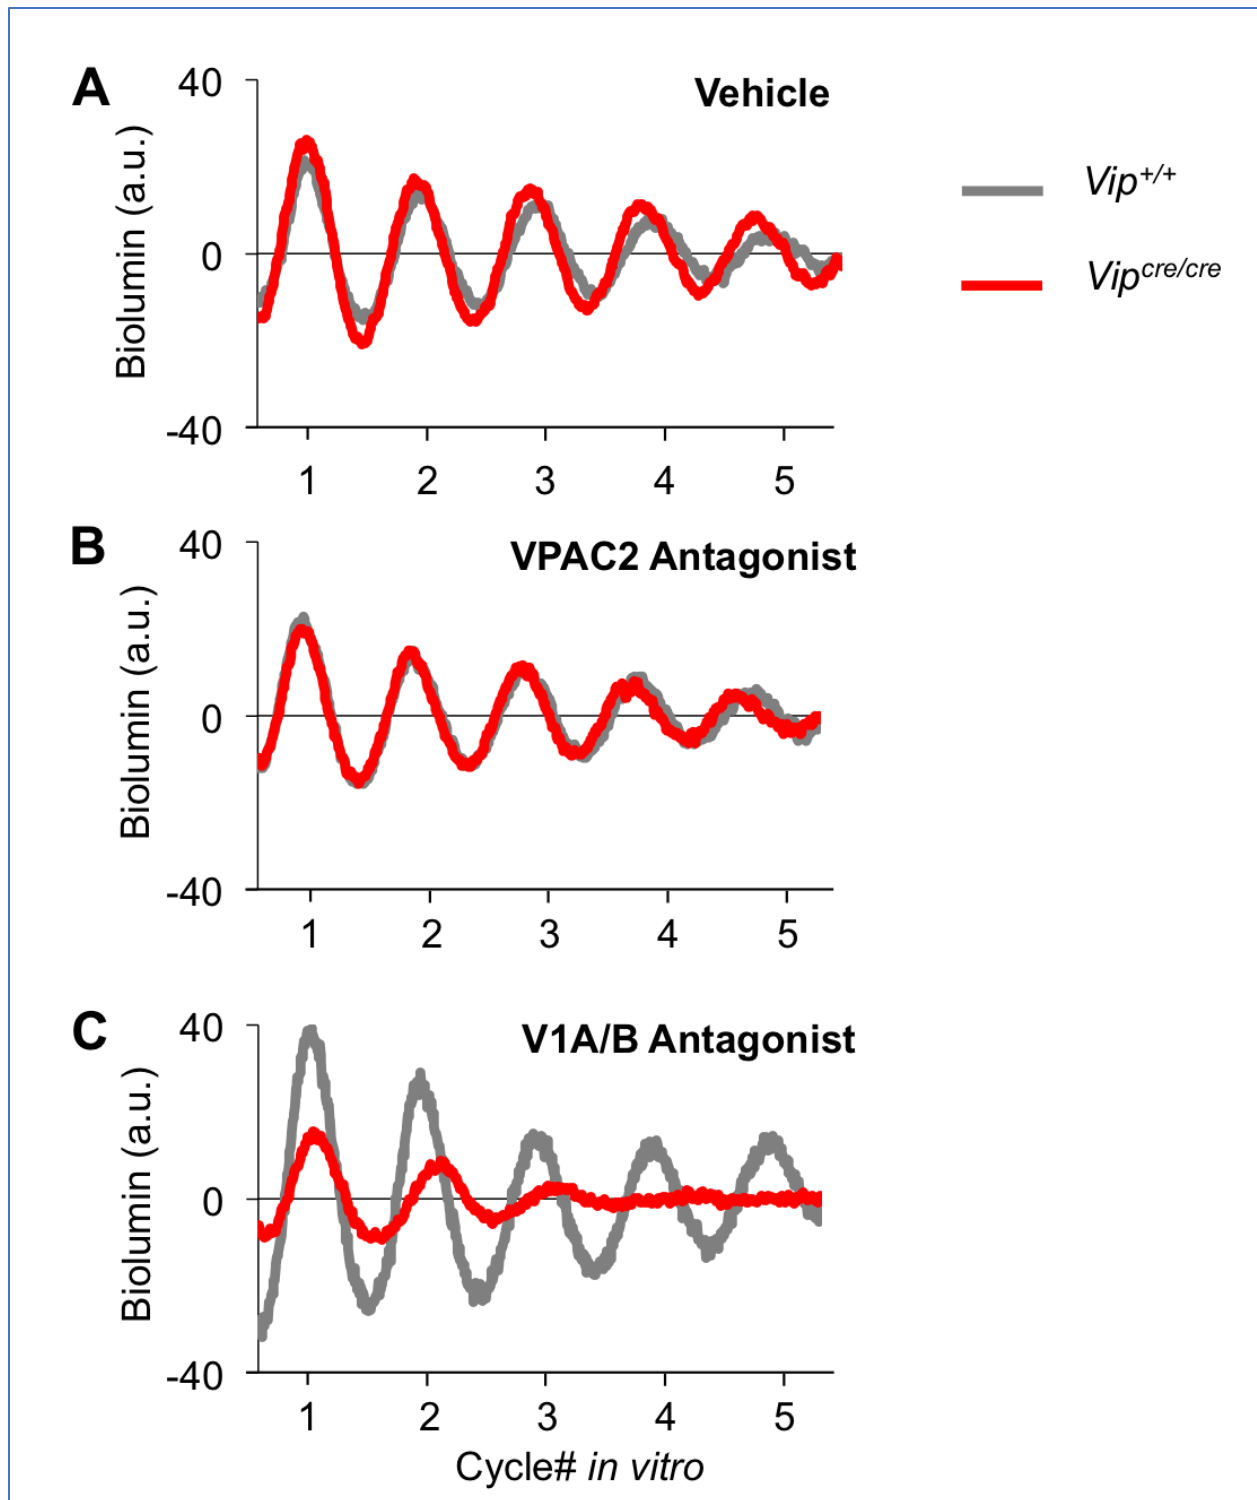

**Figure S4.** Representative PER2::LUC time series illustrating SCN bioluminescence rhythms under standard culture conditions (A), VPAC2 antagonism (B), and AVP receptor antagonism (C).
